1                   **Metabolic and demographic evolution in response to interspecific competition**

2                                   **Authors:** Giulia Ghedini<sup>1,2\*</sup>, Dustin J. Marshall<sup>1</sup>

3                   **Affiliations:**

4  
5                   <sup>1</sup> Centre for Geometric Biology, School of Biological Sciences, Monash University; Clayton  
6                   campus, 3800 Clayton, VIC, Australia.

7                   <sup>2</sup> Present address: Instituto Gulbenkian de Ciência; Rua Quinta Grande 6, 2780-156 Oeiras,  
8                   Portugal.

9                   \* Corresponding author. Email: [gghedini@igc.gulbenkian.pt](mailto:gghedini@igc.gulbenkian.pt)  
10

11                   **Summary**

12                   Species traits can evolve rapidly in response to competition, influencing the diversity and productivity  
13                   of communities. Metabolic and life history theories both predict how competition should affect  
14                   metabolism, size, and demography. However, these predictions are based on indirect evidence from  
15                   macroevolutionary patterns or among-species comparisons. Direct experimental tests are rare and  
16                   mostly focused on single or pairs of species, so how species evolve in communities is unclear,  
17                   particularly in eukaryotes. We use experimental evolution of eukaryotic marine phytoplankton to  
18                   examine how metabolism, size, and demography coevolve under competition. Specifically, we  
19                   compare the traits of a focal species that evolved either alone, with intraspecific competitors or with a  
20                   community at two points in time. We find that the focal species evolved both size and metabolism  
21                   under competition, which led to an increase in carrying capacity as in max. population density. These  
22                   demographic changes were predicted by classic metabolic theory based on the species-specific  
23                   scaling of metabolism with size. However, we also find important departures from theory. Evolution  
24                   led to Pareto improvements in both population growth rate and carrying capacity, so the existence of  
25                   classic r-K trade-offs seems less inevitable than what suggested by among-species comparisons. The  
26                   finding that both intra- and inter-specific competition maximize carrying capacity through changes in  
27                   size and metabolism could have important consequences for our ability to predict evolution in  
28                   communities.

29

30                   *Keywords:* energy flux, community, species interactions, fitness, homeostasis, resources

31

32

33

34

35

## 36 **Introduction**

37 When ecological and evolutionary processes occur on similar timescales, eco-evolutionary dynamics  
38 can shape the diversity and functioning of communities (1–3). Studies in bacteria imply that  
39 competition from whole communities influences evolution in ways that are fundamentally different  
40 from simpler pairwise interactions (4–6). Whether these results extend to eukaryotic communities,  
41 where species have lower population densities and longer life cycles, remains unclear (7).

42 Macroevolutionary patterns suggest that competition for resources should drive species to evolve  
43 different traits (e.g. Darwin's finches) (8–10). Divergence in resource-exploiting traits should reduce  
44 the intensity of competition because it minimizes overlap between species. However, when species  
45 compete for non-substitutable resources, trait divergence might not be a viable option to escape  
46 competition – which has been shown both theoretically (11,12) and empirically (3,13,14). Resolving  
47 the eco-evolutionary mechanisms that maintain the diversity of such communities remains a  
48 formidable challenge (15).

49 Metabolic theory has long proposed that metabolism should alter competition by setting *per capita*  
50 resource demands (16,17). For example, because of their lower absolute metabolic rates, smaller  
51 organisms have higher maximum population densities than larger organisms (18). Similarly, because  
52 small organisms usually have higher metabolism per unit mass, their populations should grow faster  
53 than those of larger organisms but sustain lower total biomass (17). Therefore, changes in size and  
54 metabolism should both affect a population's demography (19,20) but these predictions are derived  
55 from among-species comparisons that might not reflect how size, metabolism and demography  
56 covary within species (21,22). Furthermore, metabolic theory centres on the special case that  
57 resource acquisition is independent of metabolic rate, which is likely violated in many populations  
58 (23,24). If resource acquisition positively covaries with metabolism, competition could favour the  
59 evolution of larger sizes, as predicted by classic r-K models (25), but these ideas have never been  
60 tested in communities.

61 We combined experimental evolution and metabolic theory to determine how size, energy fluxes, and  
62 demography coevolve in response to competition. We base our assessment on a focal species, the  
63 marine eukaryotic microalga *Dunaliella tertiolecta*, which we evolved for 10 weeks in one of three  
64 competitive environments. To manipulate competition we used dialysis bags that physically isolated  
65 the focal species from its competitors while maintaining competition for light and nutrients (6,26–28).

66 The environments were: 1) the species surrounded by no competitors, 2) intraspecific competitors (a  
67 population of the same species) or 3) interspecific competitors (a community of three other  
68 phytoplankton species) (Fig. 1). We take the population not surrounded by competitors as a reference  
69 control. Each week we batch-transferred both the focal species and the competitors, standardizing  
70 biovolumes between treatments. At two points in time (after 5 and 10 weeks) we used common  
71 garden experiments to determine how the life history traits of the focal species evolved: metabolism  
72 (photosynthesis, respiration, and net daily energy production), morphology (cell size and shape) and  
73 demography (growth rate, max. population density, and max. total biomass).  
74

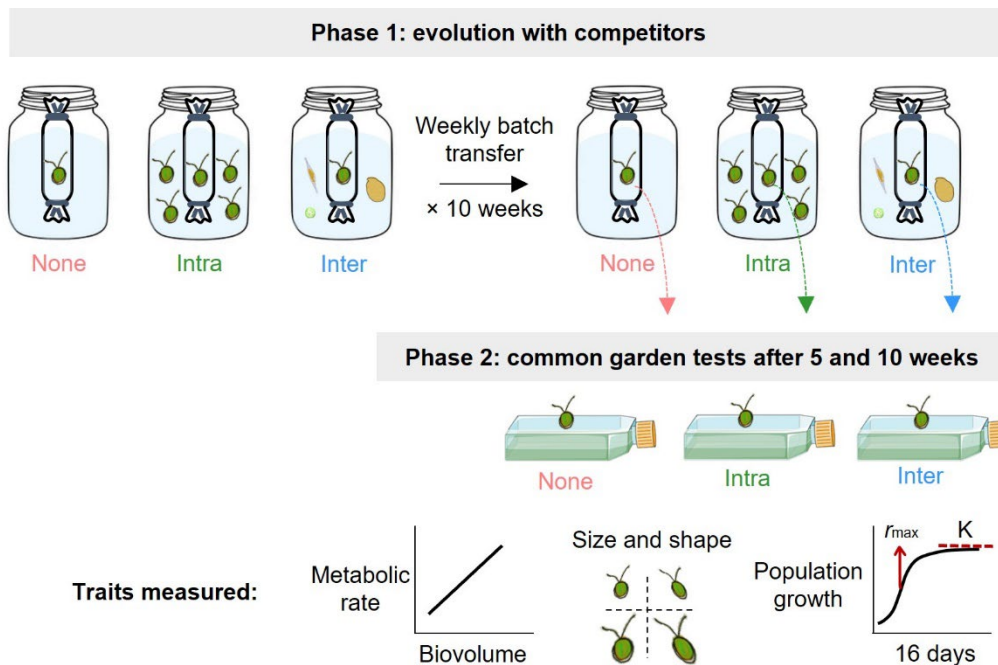

75  
76 **Figure 1.** Experimental design. The focal species *Dunaliella tertiolecta* was grown in a dialysis tubing  
77 placed in one of 3 environments for 10 weeks: with no competitors (“none”), with intraspecific  
78 competitors (“intra”) or with a community of three interspecific competitors (“inter”). Each week we  
79 performed a batch transfer of both the focal species and competitors. Mid-way (after 5 weeks) and at  
80 the end of this experiment (10 weeks) we quantified changes in metabolism (photosynthesis,  
81 respiration), morphology (size, shape), demography ( $r_{max}$ ,  $K_{cells}$ ,  $K_{bio}$ ) of the focal species in common  
82 garden experiments.  
83

## 84 **Results**

### 85 *Metabolism evolves under competition but the effects depend on growth phase*

86 Energy fluxes only showed some signs of evolution after 5 weeks of competition. We could find no  
87 differences in energy fluxes when populations were growing (photosynthesis:  $F_{2,178} = 1.11$ ,  $p = 0.33$ ;  
88 respiration:  $F_{2,176} = 2.75$ ,  $p = 0.067$ ; Fig. S1), but when they were at stationary phase and resource  
89 limited, we found differences. Lineages exposed to interspecific competitors had generally lower rates  
90 of photosynthesis and respiration than lineages exposed to intraspecific or no competitors  
91 (photosynthesis: competition  $\times$  biovolume interaction,  $F_{2,270} = 3.85$ ,  $p = 0.02$ ; respiration: main  
92 competition effect,  $F_{2,272} = 6.56$ ,  $p = 0.002$ ; Fig. S1, Table S1).

93 We observed stronger, more consistent signatures of metabolic evolution after 10 weeks in the  
94 different competition regimes. During the growth phase, competition increased photosynthesis but this  
95 positive effect weakened as biovolume increased (competition  $\times$  biovolume:  $F_{2,210} = 3.59$ ,  $p = 0.03$ );  
96 while the intra- and inter-specific treatments were almost overlapping, only intra- and no competition  
97 had a significant difference in slope (Fig. 2a, Table S1). Competition also affected respiration and the  
98 evolved response was consistent across biovolumes (competition effect:  $F_{2,46} = 10.86$ ,  $p < 0.001$ ):  
99 lineages exposed to interspecific competitors evolved to have higher metabolism (Fig. 2c, Table S1).

100 During the stationary phase, the patterns in evolved metabolic responses were quite different.  
101 Lineages exposed to interspecific competitors had lower photosynthesis rates than either the intra- or  
102 no competition lineages (competition effect:  $F_{2,47} = 6.75$ ,  $P = 0.003$ ; Fig. 2b, Table S1). We found the  
103 same for respiration – lineages exposed to interspecific competition had evolved much lower  
104 respiration rates ( $F_{2,47} = 15.83$ ,  $p < 0.0001$ , Fig. 2d, Table S1).

105 We found very similar patterns when we estimated net energy production from photosynthesis and  
106 respiration rates on a daily cycle. When populations were growing, lineages exposed to competition  
107 produced more net energy but this declined as biovolume increased (Fig. 2e). When populations  
108 approached carrying capacity, the lineages exposed to interspecific competitors had much lower rates  
109 of net energy production (Fig. 2f).

110 At this point in time (10 weeks), we calculated the scaling of metabolism with cell size for our species  
111 for the three competition treatments together. We found that both photosynthesis and respiration rates  
112 scaled hyper-allometrically with cell size ( $P$ : 1.31 [CI: 1.05; 1.58];  $R$ : 1.28 [1.02; 1.55]) but the scaling

113 became progressively shallower as populations grew denser over time ( $-0.06$  and  $-0.05$  per day,  
114 respectively). Results did not qualitatively change when we analysed each competition treatment  
115 separately, as each of them scaled  $> 1$  and declined over time (Table S2).

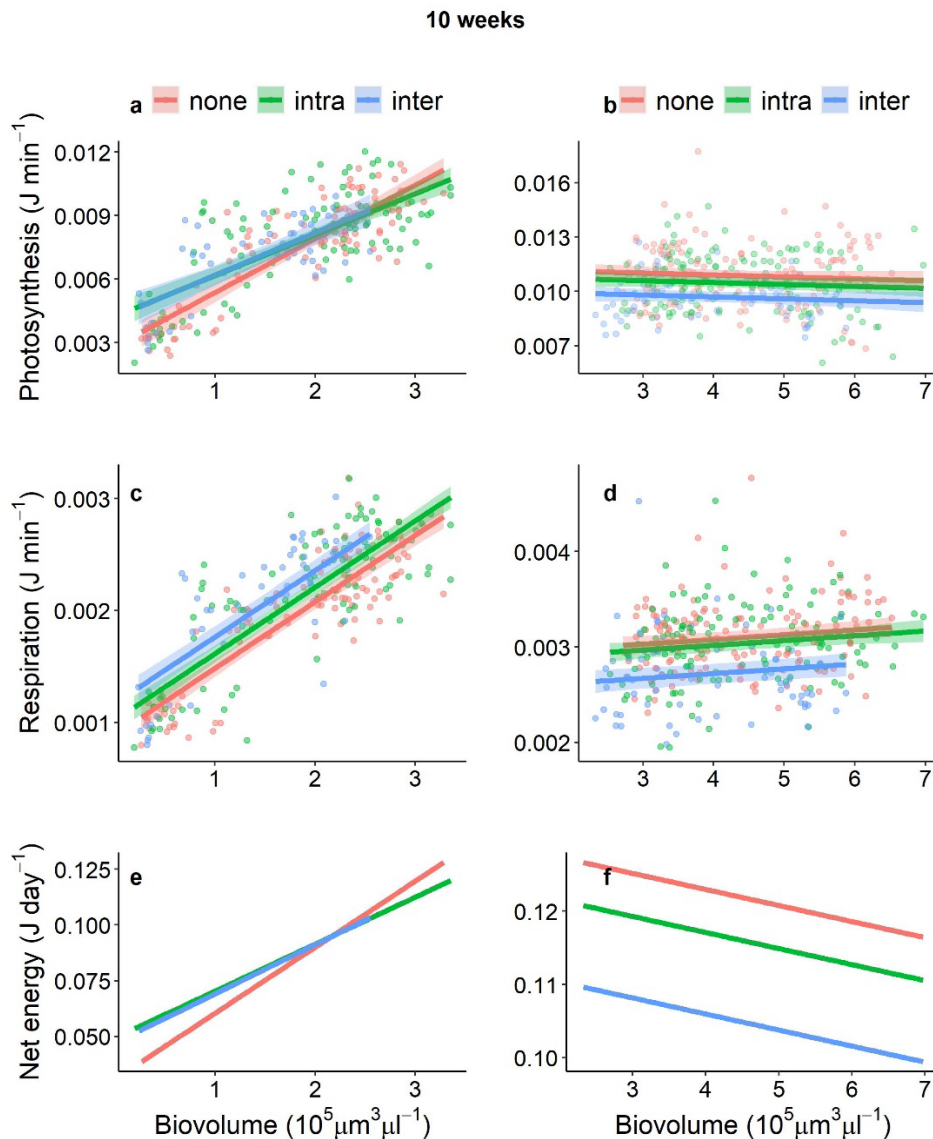

116

117 **Figure 2.** Oxygen evolution rates during the exponential growth phase (left) and stationary phase  
118 (right) after ten weeks with competitors. Populations exposed to competitors evolved greater  
119 photosynthesis (a) and respiration rates (c) during the growth phase. When approaching carrying  
120 capacity, populations that experienced competition from interspecifics evolved much lower metabolic  
121 rates (b for photosynthesis, d for respiration). Estimates of daily net energy production follow similar  
122 patterns (e and f).

123 *Competition alters the morphology of cells*

124 Competition induced evolutionary changes in the size and shape of cells, which were visible despite  
125 variations in both size and shape as populations grew during common gardens (time × competition,  
126 Table S3, Fig. S2). Cells exposed to competition evolved smaller sizes than no-competition cells (Fig.  
127 3a for day 3 after 10 weeks). There was no difference in cell size between intra- and inter-specific  
128 competition after 5 weeks (Table S4), but after 10 weeks cells experiencing interspecific competition  
129 were the smallest (no competition > intra > inter; Fig. 3a; Table S4 for post hoc comparisons for each  
130 day). Shape evolved with size as the smaller cells exposed to competitors were also rounder (Fig. 3b  
131 for day 3; Fig. S2 for all days; Table S4 for post-hoc comparisons).

132

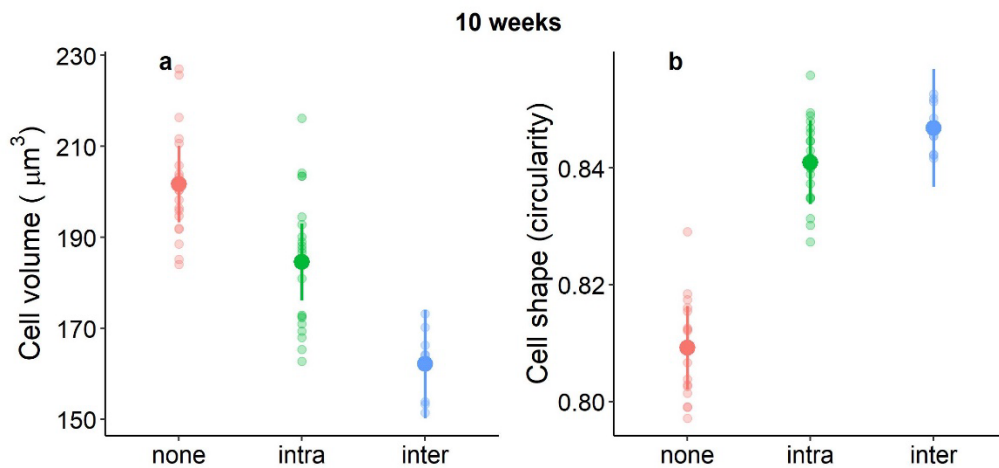

133

134 **Figure 3.** Both cell size and shape evolve in response to competition. After 10 weeks, lineages  
135 exposed to competitors evolved smaller cell sizes and this decline is stronger in response to  
136 interspecific competitors (a, here shown for day 3). Changes in cell size are accompanied by changes  
137 in shape: the smaller cells exposed to competitors are rounder than cells that experienced no  
138 competition; we find no effect of the type of competitors on shape (intra = inter). See Fig. S2 for the  
139 complete temporal series.

140 *Demography evolves to maximise maximum population density*

141 Our focal species evolved its demography in response to competition. After 5 weeks, lineages that  
142 experienced competition had lower maximum growth rates but greater carrying capacity than lineages  
143 grown without competitors, displaying the classic trade-off between  $r$  and  $K$  in terms of cell numbers  
144 (effect of competition on  $r_{max}$ :  $F_{2,42} = 10.46$ ,  $p < 0.0005$ , Fig. 4a; effect on  $K_{cells}$ :  $F_{2,42} = 19.18$ ,  $p <$   
145  $0.001$ , Fig. 4b). The evolved demographic responses were similar regardless of whether competition  
146 was intra- or inter-specific (Fig. S3, Table S5). After 10 weeks, we found the same evolved difference  
147 in carrying capacity ( $K_{cells}$ ;  $F_{2,46} = 13.91$ ,  $p < 0.001$ , Fig. 4d) but the competition-exposed lineages had  
148 evolved max. growth rates that were equivalent to the competition-free lineages ( $F_{2,46} = 1.97$ ,  $p =$   
149  $0.15$ , Fig. 4c; Table S5).

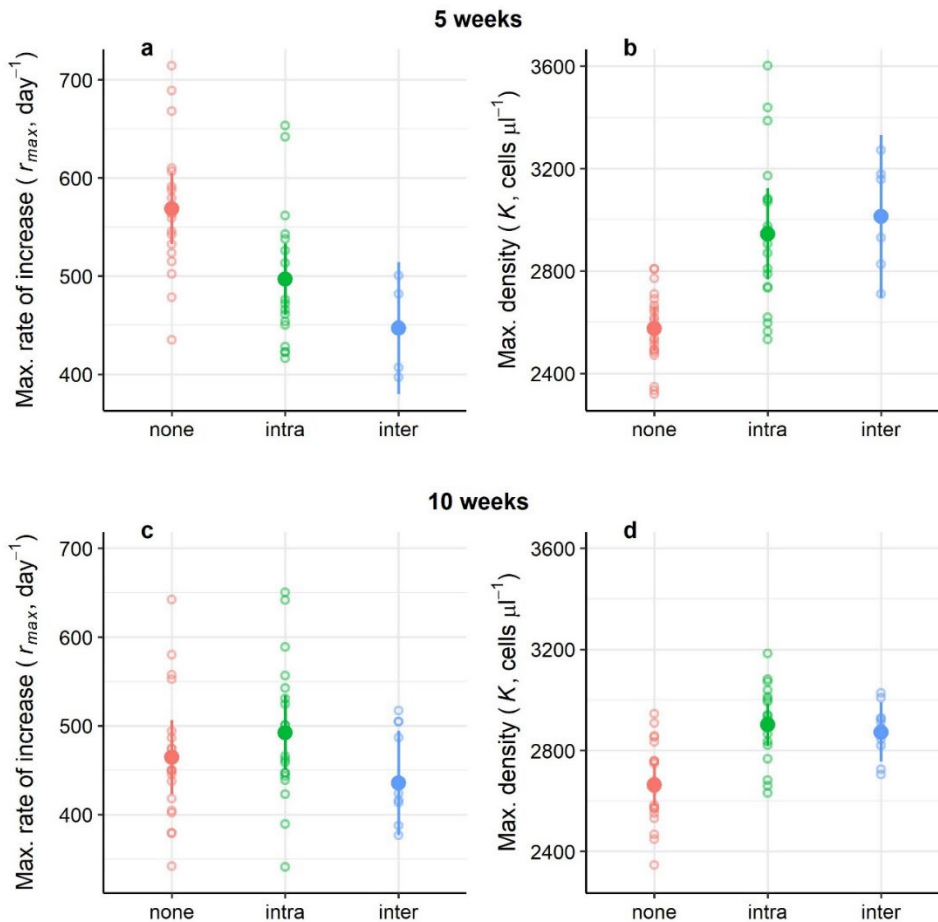

150

151 **Figure 4.** Populations that previously experienced competition had lower maximum population growth  
152 rates but greater carrying capacity in terms of cell numbers after 5 weeks (top row). Differences in  
153 carrying capacity persisted after 10 weeks but with no difference in growth rates (bottom row). At  
154 either time, the type of competition experienced (intra- or inter-specific) did not affect population  
155 growth parameters.

156 *Does the scaling of metabolism with size explain demographic changes?*

157 We used the scaling of respiration with cell size for any given day for our species (estimated above,  
158 see “*Metabolism*”) to determine the expected scaling of max. growth rate ( $r_{\max}$ ), max. population  
159 density ( $K_{\text{cells}}$ ) and total biomass at carrying capacity ( $K_{\text{bio}}$ ) according to classic metabolic theory. Both  
160 metabolic scaling and demographic parameters are those measured after 10 weeks of evolution.  
161 The theory assumes that the cost of production is directly proportional to cell size (scales with size at  
162 1) (17,21). Therefore, demographic parameters should scale at:

163 (1)  $r_{\max} = M^B/M^1 = M^{B-1}$

164 (2)  $K_{\text{cells}} = M^0/M^B = M^{-B}$

165 (3)  $K_{\text{bio}} = M \times K_{\text{cells}} = M \times M^{-B} = M^{1-B}$

166 We used early (days 1-5) respiratory scaling values for expectations about  $r_{\max}$  because it is mostly  
167 determined by growth rates early on. We used late (days 12-16) respiratory scaling values for  
168 expectations about  $K_{\text{cells}}$  and  $K_{\text{bio}}$  because cultures reached carrying capacity in the later part of the  
169 common garden and because cell size (which affects estimates of  $K_{\text{bio}}$ ) stabilised around day 12 (Fig.  
170 S2). Based on these predictions, we expect that  $r_{\max}$  scales positively with cell size ( $B - 1 = 0.13$ ) and  
171  $K_{\text{cells}}$  scales negatively ( $-B = -0.59$ ), so that larger cells should have greater population growth and  
172 lower carrying capacities in terms of max. cell densities. We also expect that  $K_{\text{bio}}$  scales positive with  
173 size ( $1 - B = 0.40$ ) so that large cells sustain greater max. total biomass.

174 We then determined the empirical scaling of each demographic parameter with cell size for our  
175 populations, using the average cell size calculated over the same intervals above (i.e., over the first  
176 five days for  $r_{\max}$ , between day 12 and 16 for  $K_{\text{cells}}$  and  $K_{\text{bio}}$ ). We find that our data overall align with  
177 predictions from theory. We find a weaker relationship than predicted between  $r_{\max}$  and size (0.06  
178 instead of 0.13); this relationship is non-significant as the confidence intervals overlap zero ( $F_{1,48} =$   
179 0.02,  $p = 0.88$ ; CI:  $-0.71$ ; 0.83; Fig. 5a). In quantitative agreement with theory, we find that  $K_{\text{cells}}$   
180 declines ( $-0.56$  instead of  $-0.59$ ;  $F_{1,48} = 22.4$ ,  $p < 0.001$ ; CI:  $-0.79$ ;  $-0.32$ ; Fig. 5b), while  $K_{\text{bio}}$   
181 increases with size (0.44 instead of 0.40;  $F_{1,48} = 14.1$ ,  $p < 0.001$ ; Fig. 5c).

182



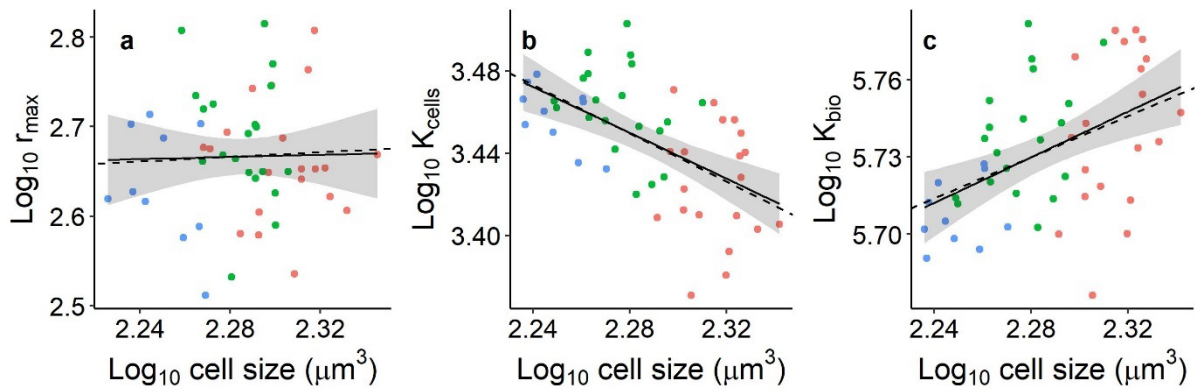

183

184 **Figure 5.** Scaling of max. growth rate ( $r_{\max}$ ), max. cell density ( $K_{\text{cells}}$ ) and max. biovolume ( $K_{\text{bio}}$ ) with  
185 cell size observed from our data after 10 weeks with competitors (solid line) and predicted from  
186 classic metabolic theory (i.e. assuming that the cost of production scales with size at 1; broken line).  
187 Slopes are:  $r_{\max}$  = observed 0.06 (CI: -0.71; 0.83); expected 0.13;  $K_{\text{cells}}$  = observed -0.56 (CI: -0.79; -  
188 0.32); expected -0.59;  $K_{\text{bio}}$  = observed 0.44 (CI: 0.21; 0.68); expected 0.40. Scaling exponents are  
189 calculated for the 3 competition treatments together (blue = inter; green = intra; red = no competition).  
190 We calculated the expected scaling of  $r_{\max}$  as the average scaling observed over the first 5 days  
191 because growth is determined early on; we calculated the expected scaling of  $K_{\text{cells}}$  and  $K_{\text{bio}}$  as the  
192 average scaling over the last 3 sampling days (12 to 16) because the cultures approached K towards  
193 the end of the common garden and cell size stabilised from day 12 onwards (Fig. S2). We used the  
194 same range of days to calculate the average cell size for each replicate shown above.

195

## 196 Discussion

197 A eukaryote evolved its size and metabolism to alter its demography and better tolerate interspecific  
198 competition. Our focal lineages first evolved higher carrying capacities in terms of population densities  
199 at the expense of faster population growth rates. But, through metabolic and size evolution, they later  
200 achieved a Pareto improvement maximising both growth rates and carrying capacity via more efficient  
201 resource use. We show that these changes in demography are predicted by classic metabolic theory,  
202 based on the scaling of metabolism with size for our species, and assuming that the cost of producing  
203 a new organism is directly proportional to its size (16,19). Accordingly, competition from a community  
204 led to the evolution of smaller cells that sustained greater maximum population densities but lower  
205 total biomass, similarly to the patterns observed among species (29).

206 Our results extend the main prediction of life history theory to interspecific competition from a  
207 community – competition in a stable environment tends to maximize max. population size, essentially  
208 the efficiency with which resources are converted into offspring (Table 1) (30–32). However,

209 increased efficiency does not necessarily come at the expense of growth rate, contrary to  
210 expectations based on classic metabolic (17,33) or life history theories (25,34–36). Empirical  
211 evidence for the existence of trade-offs within species is scarce and mostly indirect. Trade-ups seem  
212 actually more common than trade-offs; for instance, phytoplankton can improve competitive ability for  
213 different resources at no detectable cost (14,15) and bacteria can evolve larger cells that also grow  
214 faster than smaller cells despite their hypo-allometric metabolic scaling (21). We show that  
215 competition-induced evolution can break a fundamental assumption of life history theory based on r-K  
216 selection models (31,32,37). So trade-offs between r and K are not as inevitable as it has been  
217 supposed, potentially because the concomitant evolution of size and metabolism reduces constraints  
218 on production (21,38).

219 Metabolism fuels biological production (growth) and therefore should be under selection with intense  
220 competition (39). Among-species comparisons suggest that selection for efficiency should be  
221 associated with larger body sizes and lower metabolic rates (16,25,40). We find that this prediction  
222 does not hold for our species because it is based on general assumptions of how metabolism scales  
223 with size across species, i.e. hypo-allometrically. Our species showed hyper-allometric scaling of both  
224 photosynthesis (1.31) and respiration (1.28) with cell size. So, while larger cells produced more  
225 energy, they were also more expensive to maintain. Accordingly, populations exposed to competitors  
226 evolved smaller sizes which are more energetically advantageous under intense resource  
227 competition. These smaller cells had similar growth rates but greater max. cell density than larger  
228 cells, in qualitative and quantitative agreement with predictions from metabolic theory (i.e., assuming  
229 that the cost of production scales at 1). So it seems that metabolic theory can predict how changes in  
230 size and metabolism affect key demographic parameters within species, when using context-specific  
231 scaling rather than across species relationships.

232 That the scaling of metabolism with body size varies among species and environmental conditions is  
233 now well accepted (41). However, there is less recognition for the role of plasticity in metabolic scaling  
234 within the same population, even though it is important to maintain fitness and energy homeostasis  
235 (42,43). Competition should drive the evolution of fitness-enhancing metabolic traits, but both fast and  
236 slow metabolic phenotypes have been proposed to be a product of competition. A slow metabolism  
237 can be advantageous when resources are limited (24) but can come at the expense of competitive  
238 ability (44) and access to resources (23). Our results show that fluctuations in population densities

239 can maintain both metabolic phenotypes even under strong competition. All our experimental  
240 populations reduced their metabolism during the stationary phase, which seems to be common  
241 among many phytoplankton species to cope with nutrient limitation (45). But this metabolic flexibility  
242 was heightened by competition, so that populations with a history of competition had a faster  
243 metabolism when resources were abundant but much lower metabolic rates when population were  
244 dense.

245 In our species, competition selected for efficiency by favouring small cells with a lower metabolic rate  
246 per unit volume when resources were scarce (because of their hyper-allometric metabolic scaling).  
247 The advantage of small cells under nutrient limitation is well established among phytoplankton  
248 species (46); here we show that these across-species patterns might also hold within species.  
249 Smaller cells have several advantages that enables them to produce more cells per unit nutrient  
250 (38,47). They have lower sinking rates, hence more access to light, suffer less from self-shading, and  
251 are more efficient in the acquisition of nutrients due to a higher surface to volume ratio (48,49). While  
252 changes in shape can reduce the constraints of larger cell sizes on nutrient acquisition (48,50), we  
253 find that competition favours the evolution of smaller cells, rather than cells of similar size but different  
254 shape. However, overall, size and shape covaried as predicted because small, evolved cells were  
255 rounder than the larger cells not exposed to competitors.

256 Predicting how species evolve in communities remains a formidable challenge (51–53). Interactions  
257 among multiple species can diffuse competition (54), weakening selection between any pair of  
258 competitors (55,56). Our results show that both intra- and inter-specific competition from a community  
259 select for efficiency (carrying capacity of individuals), which is achieved through the concomitant  
260 evolution of size and metabolism. Overall, competition from a community exerted stronger effects on  
261 the evolution of these traits than intraspecific competition, possibly because diverse competitors  
262 consume available resources more rapidly and effectively (57,58). But it seems that the classic  
263 prediction of life history theory (selection for K under density-dependence (31)) can be extended to  
264 competition in communities, at least for species that use essential resources. Finding whether  
265 interspecific competition leads to the same evolutionary outcomes in other systems seems key to  
266 predict the evolutionary trajectory of species in communities. Interestingly, the traits that evolved more  
267 strongly under interspecific competition (i.e. size and metabolism) are also those that affect niche and  
268 fitness differences between species (59,60). Hence, a next important step would be to test how life

269 history optimization influences the coexistence of coadapted species through changes in their  
 270 metabolic scaling. Understanding how metabolism, size, and demography covary between competing  
 271 species is essential to explain patterns of biological production and extrapolate the effect of  
 272 biodiversity over time (1,22).

273

274 **Table 1.** Predicted and observed changes in life history traits based on the history of competition. We  
 275 base the main predictions on the effects of intra-specific competition and elaborate on the predicted  
 276 effects of interspecific competition on the last row.

| Trait                               | Predicted effect of intrasp. competition                                                                                                                                                  | Key references                                                                                                       | Observed effect                                                                 |
|-------------------------------------|-------------------------------------------------------------------------------------------------------------------------------------------------------------------------------------------|----------------------------------------------------------------------------------------------------------------------|---------------------------------------------------------------------------------|
| $r_{max}$                           | Decrease in a stable or low stochastic environment with high population density                                                                                                           | MacArthur 1962,<br>MacArthur & Wilson 1967<br>Mueller et al 1991                                                     | Yes / No (tradeoff with K weakens over time)                                    |
| $K_{cells}^*$                       | Increase                                                                                                                                                                                  | Lande et al. 2009<br>Engen & Sæther 2017<br><br>Kentie et al. 2020                                                   | Yes                                                                             |
| Size                                | Increase under K-selection                                                                                                                                                                | Pianka 1970<br>Bierbaum et al. 1989                                                                                  | No                                                                              |
|                                     | Decrease based on effects of nutrient limitation on phytoplankton                                                                                                                         | Litchman & Klausmier 2008                                                                                            | Yes                                                                             |
| Shape                               | More elongated to reduce surface area to volume ratio and improve nutrient uptake if cells become larger                                                                                  | Grant et al. 2021<br>Ryabov et al. 2021                                                                              | No (larger cells were more elongated but were not those exposed to competitors) |
|                                     | Rounder if cells become smaller                                                                                                                                                           |                                                                                                                      | Yes                                                                             |
| Metabolism                          | Lower metabolism, increased efficiency under K-selection                                                                                                                                  | Pianka 1970, 1972<br>Mueller & Diamond 2001<br>Lenski 2003<br>Auer et al. 2018                                       | Yes closer to carrying capacity                                                 |
|                                     | Increased metabolic rate (faster pace of life) but only if resources are abundant                                                                                                         | Auer et al. 2020<br>Pettersen et al. 2020                                                                            | Yes during growth phase                                                         |
| Effect of interspecific competition | If resource overlap among species is significant, interspecific competition should strengthen density-dependence and thus the K-selection observed under intraspecific competition alone. | MacArthur & Wilson 1967<br>Bassar et al. 2013<br>Lawrence et al. 2012<br>Jousset et al. 2016<br>Scheuerl et al. 2020 | Yes for size and metabolism.<br>No for $r_{max}$ , $K_{cells}$ , and cell shape |

277

278 \* Opposite pattern if the environment is highly stochastic and/or with low density-dependence ( $r_{max}$   
 279 increases and  $K_{cells}$  decreases). We do not expect this scenario because our environment is not highly  
 280 stochastic and our populations density-regulated.

281

## 282 **Materials and Methods**

### 283 *Overview of experimental set up*

284 We tested the effects of competition on the energy fluxes, morphology, and demography of the  
285 eukaryotic unicellular alga *Dunaliella tertiolecta*, which we obtained as a clonal strain from the CSIRO  
286 Australian National Algae Culture Collection (ANACC, strain CS-14). To manipulate the competitive  
287 environment, we enclosed the focal species in a dialysis bag which was then placed in one of three  
288 environments for 10 weeks (1<sup>st</sup> June to 10<sup>th</sup> August 2021): 1) surrounded by media with no  
289 competitors (no competition), 2) by a population of conspecifics from the same strain (intraspecific  
290 competition) or 3) by a community of three other phytoplankton species (interspecific competition).  
291 For this latter treatment, the species were chosen to represent different sizes and phytoplankton  
292 groups: *Amphidinium carterae* (CS-740), *Phaeodactylum tricornutum* (CS-29) and *Nannochloropsis*  
293 *oculata* (CS-179) (Fig. 1, phase 1). All species were sourced as clonal strains from CSIRO Algal  
294 collection. Every week we batch-transferred both the focal species and the competitors. After 5 and  
295 10 weeks, we quantified changes in the traits of the focal species in common garden experiments  
296 (phase 2).

297 We grew all species individually in 2 L glass bottles with standard f/2 enriched seawater medium  
298 enriched with silica for a month prior to the experiment. The same medium was used throughout the  
299 experiment and common gardens. The medium was prepared with 0.45  $\mu\text{m}$  filtered seawater and  
300 autoclaved following the recipe of Guillard & Ryther, 1962 (61). All experiments were performed in a  
301 temperature controlled room ( $20 \pm 1^\circ\text{C}$ ) on a 14:10 hours light:dark cycle and the cultures were grown  
302 under a light intensity of  $115 \pm 5 \mu\text{mol photons m}^{-2} \text{s}^{-1}$ .

### 303 *Phase 1: evolution with competitors*

304 The dialysis bags in which we enclosed the focal species enabled competition for light and nutrients  
305 but prevented cell mixing among phytoplankton species and exchange of bacteria (pore diameter = 24  
306 Angstrom). Each bag contained a volume of 35 ml and was placed at the centre of a 500 ml glass jar  
307 assigned to one of the three competition treatments above. We established 20 replicates for each  
308 competition treatment. We quantified the biovolume of each species as the product of cell density and  
309 cell size. For each species, we loaded two 10  $\mu\text{l}$  samples onto a Neubauer counting chamber  
310 (ProSciTech, Australia), fixed with 1% lugol's solution, and, for each sample, we took 20 photos

311 equally spaced around the cell counting grid under an Olympus light microscope at 400×  
312 magnification. We analysed the images with ImageJ and Fiji software (version 2.0) (62) to quantify the  
313 number of cells (cells  $\mu\text{l}^{-1}$ ) and their size ( $\mu\text{m}$ , length and width; diameter for *Nannochloropsis*). We  
314 calculated cell volume by assigning to each species an approximate geometric shape (63) (prolate  
315 spheroid  $V = (\pi/6) \times \text{width}^2 \times \text{length}$  for all species except *Nannochloropsis* which we treated as a  
316 sphere  $V = (\pi/6) \times \text{diameter}^3$ ). Cell circularity is calculated as  $4 \times \pi \times (\text{area}/\text{perimeter}^2)$  and ranges  
317 from 0 to 1 (perfect circle).

318 We started the experiment with an initial biovolume of  $9.6 \times 10^8 \mu\text{m}^3$  of the focal species which  
319 corresponded to 5 ml. The dialysis bag was then filled to 35 ml with media. The glass jars containing  
320 the competitors were filled to 350 ml to completely submerge the dialysis bag. To maintain the same  
321 biovolume to media ratio, the initial biovolume of the competitors was 10 times that of the focal  
322 species (i.e.  $9.6 \times 10^9 \mu\text{m}^3$ ). We added the three competitor species of the interspecific treatment in  
323 equal biovolumes. The jars of the control treatment (no competition) were filled with medium only.

324 Each week we transferred the same initial biovolume of the focal species and the same initial  
325 biovolume of the competitors to a new, sterilized set of dialysis bag and jar. We did not manipulate the  
326 relative abundance of species in the interspecific treatment. In weeks 3, 5 and 6 the cell densities of  
327 the focal species were low in the interspecific treatment. So, had we reinoculated the same initial  
328 biovolume we would not have been able to add any fresh medium. To avoid this nutrient limitation, we  
329 reinoculated only half of the initial biovolumes across all treatments. Cell densities, size and  
330 biovolume were determined as described above. By week 6, we discarded 13 lineages of the focal  
331 species in the interspecific treatment because they were contaminated by the diatom. To continue the  
332 experiment, we established an additional lineage from each of the remaining seven replicates. By the  
333 end of the experiment, we lost 4 other replicates in the interspecific treatment because of  
334 contamination.

335 The batch-transfer approach meant that all populations in our experiment experienced fluctuating  
336 densities, but those surrounded by competitors always faced greater densities and thus competition.  
337 Shifts in densities are common in nature and mediate the balance between density-independent and  
338 density-dependent selection (r- and K-selection) (37). If stochasticity is low, theory predicts that  
339 selection for K should prevail even under fluctuating conditions (Table 1) (25,31,64).

340 *Phase 2: common garden experiments*

341 To test the effects of competition on the metabolism, morphology, and demography of the focal  
342 species we did two common garden tests, one after five weeks of evolution with competitors (samples  
343 were taken at the start of week six, 6<sup>th</sup> July 2021) and one after ten weeks (10<sup>th</sup> August, end of  
344 experiment). Before each common garden, we grew the focal species in a neutral environment for two  
345 nights to remove any environmental conditioning. Both for the neutral selection and common garden,  
346 we inoculated an equal biovolume of each lineage in cell culture flasks ( $n = 20$  for the no competition  
347 and intraspecific treatments,  $n = 6$  and  $n = 10$  for the interspecific treatment in the first and second  
348 common garden, respectively). Biovolume was determined as before from the average cell size and  
349 cell density of each lineage; we decided a priori to add 15 ml of the lineage with the limiting biovolume  
350 ( $\sim 14 \times 10^8 \mu\text{m}^3$ ), back calculated the volumes of the other lineages and added 100 ml of f/2 media  
351 plus silica to all flasks. Common gardens started on 8<sup>th</sup> July and 12<sup>th</sup> August 2021 and lasted 16 days  
352 which was the approximate time needed for the cultures to reach carrying capacity. Each day, we  
353 removed 10 ml from each culture flask for sampling and replaced it with fresh media. In the first  
354 common garden we sampled every day except on day 6, 10, 13 and 15; in the second we sampled  
355 every day except on day 7, 13 and 15.

356 *Traits measurements*

357 Each sampling day, we fixed 1 ml sample with 1% Lugol's solution to quantify the cell size (volume),  
358 shape (circularity) and abundance of each lineage with ImageJ software as described above. We  
359 include cell shape in addition to size in our assessment because the shape of a cell can mediate  
360 access to resources and is thus an important component of fitness in unicellular organisms (48–  
361 50,65).

362 We measured oxygen evolution rates on 5 ml samples using 24-channel optical fluorescence oxygen  
363 readers (PreSens Sensor Dish Reader, SDR; AS-1 Scientific Wellington, New Zealand) following  
364 established protocols (66,67). Sensors were calibrated with 0% and 100% air saturation before the  
365 experiment. Net photosynthesis (oxygen production) was measured at the same light intensity at  
366 which the cultures were grown for 20 minutes, followed by 1 hr in the dark to measure respiration  
367 rates. Thirteen blanks were filled with the media obtained from centrifuged samples (spun at 2,500  
368 rpm for 10 min to separate the algae from the supernatant) to correct for background microbial activity

369 since cultures were not axenic. Prior to measurements, samples were spiked with 50  $\mu\text{l}$  of sodium  
370 bicarbonate stock for a final concentration of 2 mM sodium bicarbonate to avoid carbon limitation.  
371 The change in percentage oxygen saturation was calculated with linear regressions using the LoLinR  
372 package (68). The rate of photosynthesis or respiration of the whole sample ( $\text{VO}_2$ ; units  $\mu\text{mol O}_2/\text{min}$ )  
373 was then measured as  $\text{VO}_2 = 1 \times ((m_a - m_b)/100 \times V\beta\text{O}_2)$  following (69), where  $m_a$  is the rate of  
374 change of  $\text{O}_2$  saturation in each sample ( $\text{min}^{-1}$ ),  $m_b$  is the mean  $\text{O}_2$  saturation across all blanks  
375 ( $\text{min}^{-1}$ ),  $V$  is the sample volume (0.005 L) and  $V\beta\text{O}_2$  is the oxygen capacity of air-saturated seawater  
376 at  $20^\circ\text{C}$  and 35 ppt salinity ( $225 \mu\text{mol O}_2/\text{L}$ ). The first 3 minutes of measurements in the light were  
377 discarded for all samples. Respiration rates were calculated after 15 minutes of dark when oxygen  
378 levels showed a linear decline. Photosynthesis and respiration ( $\mu\text{mol O}_2/\text{min}$ ) were converted to  
379 calorific energy (J/min) using the conversion factor of  $0.512 \text{ J}/\mu\text{mol O}_2$  to estimate energy production  
380 and energy consumption respectively (70).

### 381 *Statistical analyses*

382 All analyses and plots were done in RStudio (version 4.1.3), separately for the two common gardens.

383 Morphology. We assessed differences in cell morphology (cell size or shape) with linear mixed  
384 models including competition treatment (3 levels) and time (day) as categorical predictors, and  
385 lineage identity as random intercept to account for repeated measures; time was considered  
386 categorical because the relationship with cell morphology was non-linear. We take day 3, during the  
387 exponential growth phase, as a reference to report post hoc results on differences in cell size and  
388 shape, and we report post hoc results for each day in supplements.

389 Demography. To test differences in the maximum rates of increase ( $r_{\text{max}}$ ) and maximum values ( $K_{\text{cells}}$ )  
390 of cell density we followed a three-step approach (described in detail in Ghedini et al. 2021 (67),  
391 adapted from Malerba et al., 2018 (71)). First, we fitted four growth models to each individual replicate  
392 lineage and chose the best-fitting model among the four candidates to best describe changes in the  
393 cell density (cells/ $\mu\text{l}$ ) of each culture over time. We used AIC to determine which growth model best  
394 described the dynamics of a culture and successful convergence was ensured for all best-fitting  
395 models. The four models were: a logistic-type sinusoidal growth model with lower asymptote forced to  
396 0 (i.e. three-parameter logistic curve), a logistic-type sinusoidal growth model with non-zero lower  
397 asymptote (i.e. four-parameter logistic curve), a Gompertz-type sinusoidal growth model (i.e. three-



398 parameter Gompertz curve) and a modified Gompertz-type sinusoidal growth model including  
399 population decline after reaching a maximum (i.e. four-parameter Gompertz-like curve including  
400 mortality). Second, we used the best-fitting model to estimate growth parameters (i.e.  $r_{\max}$  and  $K$ ) for  
401 each culture. From each nonlinear curve, we extracted the maximum predicted value ( $K$ ) of population  
402 density (cells  $\mu\text{l}^{-1}$ ). From the first derivative of the curve, we extracted the maximum rate of population  
403 increase ( $r_{\max}$ , unit:  $\text{day}^{-1}$ ). Third, we used an analysis of covariance to evaluate the influence of  
404 competition on each parameter, using a linear model including the initial cell density estimated from  
405 the previous step as a covariate and competition environment as a factor (three levels). The estimates  
406 of  $K$  of the first common garden had heterogeneous variances among treatments, so we used  
407 generalized least squares models (instead of linear models) including treatment-specific variance for  
408 each level of competition treatment (varIdent function in R). We then estimated and plotted least  
409 square means and 95% confidence intervals using Tukey p-value adjustment for comparing three  
410 estimates. Finally, we fitted the same nonlinear growth models described above across all lineages  
411 within each competition treatment to visualize qualitative differences in population growth, using AIC  
412 to select the best-fitting model.

413 Metabolism. While oxygen rates increased linearly with biovolume over the first few days, this  
414 relationship broke down in the second part of the common garden as biovolume increased ( $> \sim 3$   
415  $\mu\text{m}^3/\mu\text{l}$ ) (Fig. S4). Log-transformation did not result in linearity across the entire range of biovolume.  
416 Therefore, we analysed oxygen rates separately for the first part of the common garden during the  
417 exponential growth phase (from the day after inoculation to day 6 included), and for the second part  
418 during the stationary phase (day 7 to 16). We used linear mixed models including biovolume  
419 (covariate) and competition treatment as predictors and lineage identity as random intercept for the  
420 data of the second common garden. Because variances were heterogeneous for the photosynthesis  
421 data during the growth phase we used a generalised linear mixed model including competition-  
422 specific variances. As a last step, we estimated and plotted the net energy production of the whole  
423 sample over a 24-hr period (J/day) as 14 hr of energy produced through net photosynthesis minus 10  
424 hr of respiration using the predictions from the models.

425 We could not use mixed models on the oxygen evolution data from the first common garden because  
426 of a singular fit error likely due to the lower replication of the interspecific competition treatment ( $n =$   
427 6). Therefore, we used linear models with biovolume (covariate) and competition treatment as

428 predictors (i.e. without including lineage identity). While this is not ideal, we repeated the analyses for  
429 the August data with simple linear models and obtained the same results of mixed models (results not  
430 reported here), suggesting that oxygen rates are not strongly affected by lineage identity.

431 Nonetheless, we report the results on oxygen rates for the first common garden as a supplementary  
432 figure. For all analyses of oxygen rates, data were not transformed but biovolume was rescaled to  $10^{-5}$   
433  $\mu\text{m}^3 \mu\text{l}^{-1}$ . Interactions between biovolume and competition were removed when  $p > 0.25$  or if the  
434 interaction was not significant and the model with interaction did not perform better than the simpler  
435 model compared by AIC and anova.

436 Scaling of demographic parameters with cell size. First, we determined the scaling of metabolism with  
437 cell size for our evolved populations after ten weeks of evolution. For this assessment we combined  
438 the data of the three competition treatments which allowed us to assess a wider range of sizes. We  
439 calculated the scaling of respiration and photosynthesis, separately, from linear models including cell  
440 size and experiment day as numerical predictors. Oxygen rates and cell size were  $\log_{10}$ -transformed.  
441 We also calculated the scaling of metabolic rates with size for each competition treatment individually  
442 and obtained the same qualitative results (Table S2 in supplements). Based on these results (effects  
443 of size and experiment day), we then calculated the expected scaling of respiration with size for any  
444 given day. According to classic metabolic theory, the cost of production is directly proportional to cell  
445 size (scales with size at 1) (17,21), so demographic parameters should scale with size at:

446 (1)  $r_{\max} = M^B/M^1 = M^{B-1}$

447 (2)  $K_{\text{cells}} = M^0/M^B = M^{-B}$

448 (3)  $K_{\text{bio}} = M \times K_{\text{cells}} = M \times M^{-B} = M^{1-B}$

449 We used early (days 1-5) respiratory scaling values for expectations about  $r_{\max}$  because it is mostly  
450 determined by growth rates early on. We used late (days 12-16) respiratory scaling values for  
451 expectations about  $K_{\text{cells}}$  and  $K_{\text{bio}}$  because cultures reached carrying capacity in the later part of the  
452 common garden and because cell size (which affects estimates of  $K_{\text{bio}}$ ) stabilised around day 12. We  
453 estimated maximum total biomass ( $K_{\text{bio}}$ ) as the product of  $K_{\text{cells}}$  obtained from the population growth  
454 models and the average cell size for each replicate over the last three sampling days (day 12 to 16),  
455 that is when cell size stabilised. Finally, we determined the empirical scaling of each demographic  
456 parameter with cell size across our populations, using the average cell size calculated over the same  
457 intervals above (i.e., over the first 5 days for  $r_{\max}$ , between day 12 and 16 for  $K_{\text{cells}}$  and  $K_{\text{bio}}$ ).

458

## 459 **Acknowledgements**

460 We thank Jiaye Qin for assistance in the laboratory. This work was supported by a DECRA fellowship  
461 (DE190100660) at Monash University to GG. This work also received the support of a fellowship  
462 (LCF/BQ/PI21/11830001) from "la Caixa" Foundation (ID 100010434) and from the European Union's  
463 Horizon 2020 research and innovation programme under the Marie Skłodowska Curie grant  
464 agreement No 847648.

465

## 466 **References**

- 467 1. Aubree F, David P, Jarne P, Loreau M, Mouquet N, Calcagno V. How community adaptation  
468 affects biodiversity–ecosystem functioning relationships. *Ecol Lett.* 2020;23(8):1263–75.
- 469 2. Post DM, Palkovacs EP. Eco-evolutionary feedbacks in community and ecosystem ecology:  
470 interactions between the ecological theatre and the evolutionary play. *Philos Trans R Soc B Biol*  
471 *Sci.* 2009; 364:1629–1640.
- 472 3. Hart SP, Turcotte MM, Levine JM. Effects of rapid evolution on species coexistence. *Proc Natl*  
473 *Acad Sci.* 2019;116(6):2112.
- 474 4. Jousset A, Eisenhauer N, Merker M, Mouquet N, Scheu S. High functional diversity stimulates  
475 diversification in experimental microbial communities. *Sci Adv.* 2016;2(6):e1600124.
- 476 5. Lawrence D, Fiegna F, Behrends V, Bundy JG, Phillimore AB, Bell T, et al. Species Interactions  
477 Alter Evolutionary Responses to a Novel Environment. *PLOS Biol.* 2012;10(5):e1001330.
- 478 6. Scheuerl T, Hopkins M, Nowell RW, Rivett DW, Barraclough TG, Bell T. Bacterial adaptation is  
479 constrained in complex communities. *Nat Commun.* 2020;11(1):754.
- 480 7. Barraclough TG. How Do Species Interactions Affect Evolutionary Dynamics Across Whole  
481 Communities? *Annu Rev Ecol Evol Syst.* 2015;46(1):25–48.
- 482 8. Grant PR, Grant BR. Evolution of Character Displacement in Darwin's Finches. *Science.*  
483 2006;313(5784):224–6.
- 484 9. Rainey PB, Travisano M. Adaptive radiation in a heterogeneous environment. *Nature.*  
485 1998;394(6688):69–72.
- 486 10. Schluter D. Experimental Evidence That Competition Promotes Divergence in Adaptive  
487 Radiation. *Science.* 1994;266(5186):798–801.
- 488 11. Fox JW, Vasseur DA. Character Convergence under Competition for Nutritionally Essential  
489 Resources. *Am Nat.* 2008;172(5):667–80.
- 490 12. Abrams PA. Character displacement and niche shift analyzed using consumer-resource models  
491 of competition. *Theor Popul Biol.* 1986;29(1):107–60.
- 492 13. Germain RM, Srivastava D, Angert AL. Evolution of an inferior competitor increases resistance to  
493 biological invasion. *Nat Ecol Evol.* 2020; 4:419–425.

- 494 14. Bernhardt JR, Kratina P, Pereira AL, Tamminen M, Thomas MK, Narwani A. The evolution of  
495 competitive ability for essential resources. *Philos Trans R Soc B Biol Sci.*  
496 2020;375(1798):20190247.
- 497 15. Gallego I, Narwani A. Ecology and evolution of competitive trait variation in natural phytoplankton  
498 communities under selection. *Ecol Lett.* 2022; doi/abs/10.1111/ele.14103
- 499 16. Brown JH, Gillooly JF, Allen AP, Savage VM, West GB. Toward a metabolic theory of ecology.  
500 *Ecology.* 2004;85(7):1771–89.
- 501 17. Savage VM, Gillooly JF, Brown JH, West GB, Charnov EL. Effects of body size and temperature  
502 on population growth. *Am Nat.* 2004;163(3):429–41.
- 503 18. Damuth J. Population-density and body size in mammals. *Nature.* 1981;290(5808):699–700.
- 504 19. Isaac NJB, Carbone C, McGill B. Population and Community Ecology. In: Sibly RM, Brown JH,  
505 Kodric-Brown A, editors. *Metabolic Ecology.* 2012.
- 506 20. Malerba ME, Marshall DJ. Size-abundance rules? Evolution changes scaling relationships  
507 between size, metabolism and demography. *Ecol Lett.* 2019;22:1407–16.
- 508 21. Marshall DJ, Malerba M, Lines T, Sezmis AL, Hasan CM, Lenski RE, et al. Long-term  
509 experimental evolution decouples size and production costs in *Escherichia coli*. *Proc Natl Acad*  
510 *Sci.* 2022;119(21):e2200713119.
- 511 22. White CR, Alton LA, Bywater CL, Lombardi EJ, Marshall DJ. Metabolic scaling is the product of  
512 life-history optimization. *Science.* 2022;377(6608):834–9.
- 513 23. Schuster L, Cameron H, White CR, Marshall DJ. Metabolism drives demography in an  
514 experimental field test. *Proc Natl Acad Sci U S A.* 2021;118(34):e2104942118.
- 515 24. Auer SK, Bassar RD, Turek D, Anderson GJ, McKelvey S, Armstrong JD, et al. Metabolic Rate  
516 Interacts with Resource Availability to Determine Individual Variation in Microhabitat Use in the  
517 Wild. *Am Nat.* 2020;196(2):132–44.
- 518 25. Pianka ER. On r- and K-Selection. *Am Nat.* 1970;104(940):592–7.
- 519 26. Berga M, Székely AJ, Langenheder S. Effects of disturbance intensity and frequency on bacterial  
520 community composition and function. *PLoS ONE.* 2012;7(5):e36959–e36959.
- 521 27. Pomati F, Jokela J, Castiglioni S, Thomas MK, Nizzetto L. Water-borne pharmaceuticals reduce  
522 phenotypic diversity and response capacity of natural phytoplankton communities. *PLoS ONE.*  
523 2017;12(3):e0174207.
- 524 28. Poulson-Ellestad KL, Jones CM, Roy J, Viant MR, Fernández FM, Kubanek J, et al.  
525 Metabolomics and proteomics reveal impacts of chemically mediated competition on marine  
526 plankton. *Proc Natl Acad Sci.* 2014;111(24):9009.
- 527 29. Hatton IA, Dobson AP, Storch D, Galbraith ED, Loreau M. Linking scaling laws across  
528 eukaryotes. *Proc Natl Acad Sci.* 2019;116(43):21616.
- 529 30. Charlesworth B. Selection in Density-Regulated Populations. *Ecology.* 1971;52(3):469–74.
- 530 31. Lande R, Engen S, Sæther BE. An evolutionary maximum principle for density-dependent  
531 population dynamics in a fluctuating environment. *Philos Trans R Soc B Biol Sci.*  
532 2009;364(1523):1511–8.
- 533 32. MacArthur R. Some generalized theorems of natural selection. *PNAS.* 1962;48(11):1893–7.

- 534 33. Perkins DM, Perna A, Adrian R, Cermeño P, Gaedke U, Huete-Ortega M, et al. Energetic  
535 equivalence underpins the size structure of tree and phytoplankton communities. *Nat Commun.*  
536 2019;10(1):255.
- 537 34. Mueller LD, Guo P, Ayala FJ. Density-Dependent Natural Selection and Trade-Offs in Life History  
538 Traits. *Science.* 1991;253(5018):433–5.
- 539 35. Mueller LD, Ayala FJ. Trade-off between r-selection and K-selection in *Drosophila* populations.  
540 *Proc Natl Acad Sci.* 1981;78(2):1303–5.
- 541 36. Sæther BE, Visser ME, Grøtan V, Engen S. Evidence for r- and K-selection in a wild bird  
542 population: a reciprocal link between ecology and evolution. *Proc R Soc B Biol Sci.*  
543 2016;283(1829):20152411.
- 544 37. MacArthur RH, Wilson EO. *The Theory of Island Biogeography.* Princeton University Press; 1967.
- 545 38. Malerba ME, Palacios MM, Palacios Delgado YM, Beardall J, Marshall DJ. Cell size,  
546 photosynthesis and the package effect: an artificial selection approach. *New Phytol.*  
547 2018;219(1):449–61.
- 548 39. Bassar RD, Lopez-Sepulcre A, Reznick DN, Travis J, Brodie AEED, McPeck EMA. Experimental  
549 Evidence for Density-Dependent Regulation and Selection on Trinidadian Guppy Life Histories.  
550 *Am Nat.* 2013;181(1):25–38.
- 551 40. Glazier DS. Is metabolic rate a universal ‘pacemaker’ for biological processes? *Biol Rev.*  
552 2015;90(2):377–407.
- 553 41. Norin T, Metcalfe NB. Ecological and evolutionary consequences of metabolic rate plasticity in  
554 response to environmental change. *Philos Trans R Soc B Biol Sci.* 2019;374(1768):20180180.
- 555 42. Grant NA, Maddamsetti R, Lenski RE. Maintenance of Metabolic Plasticity despite Relaxed  
556 Selection in a Long-Term Evolution Experiment with *Escherichia coli*. *Am Nat.* 2021;198(1):93–  
557 112.
- 558 43. Auer SK, Salin K, Rudolf AM, Anderson GJ, Metcalfe NB. Flexibility in metabolic rate confers a  
559 growth advantage under changing food availability. *J Anim Ecol.* 2015;84(5):1405–11.
- 560 44. Pettersen AK, Hall MD, White CR, Marshall DJ. Metabolic rate, context-dependent selection, and  
561 the competition-colonization trade-off. *Evol Lett.* 2020;4:333–44.
- 562 45. López-Sandoval DC, Rodríguez-Ramos T, Cermeño P, Sobrino C, Marañón E. Photosynthesis  
563 and respiration in marine phytoplankton: Relationship with cell size, taxonomic affiliation, and  
564 growth phase. *J Exp Mar Biol Ecol.* 2014;457:151–9.
- 565 46. Litchman E, Klausmeier CA, Schofield OM, Falkowski PG. The role of functional traits and trade-  
566 offs in structuring phytoplankton communities: scaling from cellular to ecosystem level. *Ecol Lett.*  
567 2007;10(12):1170–81.
- 568 47. Rabbers I, Gottstein W, Feist AM, Teusink B, Bruggeman FJ, Bachmann H. Selection for Cell  
569 Yield Does Not Reduce Overflow Metabolism in *Escherichia coli*. *Mol Biol Evol.*  
570 2021;39(1):msab345.
- 571 48. Hillebrand H, Acevedo-Trejos E, Moorthi SD, Ryabov A, Striebel M, Thomas PK, et al. Cell size  
572 as driver and sentinel of phytoplankton community structure and functioning. *Funct Ecol.*  
573 2022;36(2):276–93.
- 574 49. Litchman E, Klausmeier CA. Trait-Based Community Ecology of Phytoplankton. *Annu Rev Ecol*  
575 *Evol Syst.* 2008;39(1):615–39.

- 576 50. Grant NA, Abdel Magid A, Franklin J, Dufour Y, Lenski RE. Changes in Cell Size and Shape  
577 during 50,000 Generations of Experimental Evolution with *Escherichia coli*. *J Bacteriol.*  
578 2021;203(10):e00469-20.
- 579 51. Barabás G, J. Michalska-Smith M, Allesina S. The Effect of Intra- and Interspecific Competition  
580 on Coexistence in Multispecies Communities. *Am Nat.* 2016;188(1):E1–12.
- 581 52. Levine JM, Bascompte J, Adler PB, Allesina S. Beyond pairwise mechanisms of species  
582 coexistence in complex communities. *Nature.* 2017; 546:56-64.
- 583 53. Yamamichi M, Gibbs T, Levine JM. Integrating eco-evolutionary dynamics and modern  
584 coexistence theory. *Ecol Lett.* 2022;25:2091–106.
- 585 54. Barbier M, de Mazancourt C, Loreau M, Bunin G. Fingerprints of High-Dimensional Coexistence  
586 in Complex Ecosystems. *Phys Rev X.* 2021;11(1):011009.
- 587 55. Miller TE, Moran ER, terHorst CP. Rethinking Niche Evolution: Experiments with Natural  
588 Communities of Protozoa in Pitcher Plants. *Am Nat.* 2014;184(2):277–83.
- 589 56. Lankau RA. Rapid Evolutionary Change and the Coexistence of Species. *Annu Rev Ecol Evol*  
590 *Syst.* 2011;42(1):335–54.
- 591 57. Maynard DS, Crowther TW, Bradford MA. Competitive network determines the direction of the  
592 diversity–function relationship. *Proc Natl Acad Sci.* 2017;114(43):11464.
- 593 58. Vallina SM, Cermeno P, Dutkiewicz S, Loreau M, Montoya JM. Phytoplankton functional diversity  
594 increases ecosystem productivity and stability. *Ecol Model.* 2017;361:184–96.
- 595 59. Gallego I, Venail P, Ibelings BW. Size differences predict niche and relative fitness differences  
596 between phytoplankton species but not their coexistence. *ISME J.* 2019;13(5):1133–43.
- 597 60. Brandl SJ, Quigley CN, Casey JM, Mercière A, Schiettekatte NMD, Norin T, et al. Metabolic rates  
598 mirror morphological and behavioral differences in two sand-dwelling coral reef gobies. *Mar Ecol*  
599 *Prog Ser.* 2022;684:79–90.
- 600 61. Guillard RRL, Ryther JH. Studies of marine planktonic diatoms. I. *Cyclotella nana* Hustedt and  
601 *Detonula confervacea* Cleve. *Can J Microbiol.* 1962;8:229–39.
- 602 62. Schindelin J, Arganda-Carreras I, Frise E, Kaynig V, Longair M, Pietzsch T, et al. Fiji: an open-  
603 source platform for biological-image analysis. *Nat Methods.* 2012;9(7):676–82.
- 604 63. Hillebrand H, Dürselen CD, Kirschtel D, Pollinger U, Zohary T. Biovolume calculation for pelagic  
605 and benthic microalgae. *J Phycol.* 1999;35(2):403–24.
- 606 64. Lenski RE. Phenotypic and Genomic Evolution during a 20,000-Generation Experiment with the  
607 Bacterium *Escherichia coli*. In: *Plant Breeding Reviews*. John Wiley & Sons, Ltd; 2003. p. 225–  
608 65, ch8.
- 609 65. Ryabov A, Kerimoglu O, Litchman E, Olenina I, Roselli L, Basset A, et al. Shape matters: the  
610 relationship between cell geometry and diversity in phytoplankton. *Ecol Lett.* 2021;24(4):847–61.
- 611 66. Malerba ME, White CR, Marshall DJ. Phytoplankton size-scaling of net-energy flux across light  
612 and biomass gradients. *Ecology.* 2017;98(12):3106–15.
- 613 67. Ghedini G, Marshall DJ, Loreau M. Phytoplankton diversity affects biomass and energy  
614 production differently during community development. *Funct Ecol.* 2022;36:446–57.
- 615 68. Olito C, White CR, Marshall DJ, Barneche DR. Estimating monotonic rates from biological data  
616 using local linear regression. *J Exp Biol.* 2017;220(5):759.

- 617 69. White CR, Kearney MR, Matthews PGD, Kooijman SALM, Marshall DJ. A Manipulative Test of  
618 Competing Theories for Metabolic Scaling. *Am Nat.* 2011;178(6):746–54.
- 619 70. Williams PJ le B, Laurens LML. Microalgae as biodiesel & biomass feedstocks: Review &  
620 analysis of the biochemistry, energetics & economics. *Energy Environ Sci.* 2010;3(5):554–90.
- 621 71. Malerba ME, Palacios MM, Marshall DJ. Do larger individuals cope with resource fluctuations  
622 better? An artificial selection approach. *Proc R Soc B Biol Sci.* 2018;285(1884):20181347.
